# Supplementary material
Source: PubMed Central journal article supplement (PMC8208294)
Supplement: cri_42_1_78_esm1.pdf [file cri_42_1_78_esm1.pdf]

**Electronic Supplementary Material 1:**

**Table 1.** Percentages of sociodemographic characteristics, psychosocial problems, unsafe environment and substance use of students reporting suicidal thoughts or attempts (STBs) at t1 only, and of students who persisted having STBs at t2.

| Characteristics (at t1)    | STBs at t1, but not at t2 | STBs at t1 and t2 |
|----------------------------|---------------------------|-------------------|
| Gender                     | n=858                     | n=363             |
| Boys                       | 33.9                      | 25.1              |
| Girls                      | 66.1                      | 74.9*             |
| Ethnicity                  | n=858                     | n=363             |
| Dutch                      | 38.8                      | 44.4              |
| non-Dutch                  | 61.2                      | 55.6              |
| Educational level          | n=687                     | n=288             |
| Low (Pre-vocational)       | 56.2                      | 47.2              |
| High                       | 43.8                      | 52.8*             |
| Family composition         | n=858                     | n=363             |
| With both parents          | 67.7                      | 60.3              |
| Not with both parents      | 32.3                      | 39.7*             |
| Psychosocial problems      | n=857                     | n=363             |
| No                         | 74.4                      | 66.4              |
| Yes                        | 25.6                      | 33.6*             |
| Bully victim               | n=858                     | n=363             |
| No                         | 85.7                      | 81.3              |
| Yes                        | 14.3                      | 18.7              |
| Physical abuse             | n=791                     | n=339             |
| No                         | 95.6                      | 92.3              |
| Yes                        | 4.4                       | 7.7*              |
| Mental abuse               | n=773                     | n=326             |
| No                         | 91.8                      | 86.5              |
| Yes                        | 8.2                       | 13.5*             |
| Unwanted sexual experience | n=814                     | n=346             |
| No                         | 92.6                      | 91.0              |
| Yes                        | 7.4                       | 9.0               |
| Alcohol last month         | n=850                     | n=361             |
| No                         | 83.6                      | 79.5              |
| Yes                        | 16.4                      | 20.5              |
| Cannabis last month        | n=855                     | n=362             |
| No                         | 98.0                      | 96.4              |
| Yes                        | 2.0                       | 3.6               |

\*Significantly different between groups  $p < 0.05$
